# Development and Clinical Validation of a Miniaturized Finger Probe for Bedside Hemodynamic Monitoring

Tuukka Panula\*<sup>1</sup>, Jukka-Pekka Sirkiä<sup>1</sup>, Tero Koivisto<sup>1</sup>, Mikko Pänkäälä<sup>1</sup>, Teemu Niiranen<sup>2,3</sup>, Ilkka Kantola<sup>3</sup>, and Matti Kaisti\*<sup>1</sup>

<sup>1</sup>Department of Computing, University of Turku, Finland

<sup>2</sup>Department of Internal Medicine, University of Turku, Finland

<sup>3</sup>Division of Turku University Hospital, Finland

August 23, 2022

## Abstract

*Background:* Hypertension, or elevated blood pressure (BP), is a marker for many cardiovascular diseases and can lead to life-threatening conditions such as heart failure, coronary artery disease, and stroke. BP monitoring using a traditional arm cuff device is often inconvenient and possibly painful in long-term use, i.e. during sleep. *Methods:* We present a miniature cuffless tonometric finger probe system, that uses the oscillometric method to measure blood pressure (BP). Our approach uses a motorized press that is used to apply pressure to the finger tip to measure BP. *Results:* We verified the functionality of the device in a clinical trial (n=43) resulting in systolic (SBP) and diastolic (DBP) pressures ( $(\text{mean} \pm \text{SD})$  mmHg) of  $(-3.5 \pm 8.4)$  mmHg and  $(-4.0 \pm 4.4)$  mmHg, respectively. Comparison was made with manual auscultation (n=26) and automated cuff oscillometry (n=18). In addition to BP, we demonstrated the ability of the device to assess arterial stiffness (n=18) and detect atrial fibrillation (n=6). *Conclusions:* We were able to introduce a sufficiently small device that could be used for convenient ambulatory measurements and worn during sleep with minimal discomfort. Lastly, we evaluate methods to further develop the concept and discuss future directions.

## Plain language summary

Traditional cuff-based automated BP instruments are mainly suitable for individual measure-

ments and are often inconvenient to use. Patients in a hospital ward are typically monitored with many systems and devices. Our aim is to develop a blood pressure measurement technology that could be integrated into a finger-worn pulse oximeter. This way the need for a bulky and inconvenient arm cuff could be eliminated and the number of needed monitoring devices could be reduced. The proposed technology is especially suitable for pseudo-continuous BP measurement, that is, taking automated measurements periodically, enabling BP trend tracking and analysis. In this study, we clinically validate our technology for blood pressure monitoring and further demonstrate its potential to measure arterial stiffness and detect atrial fibrillation.

## 1 Introduction

Untreated hypertension is the greatest single contributor for cardiovascular disease and sudden cardiac death. Uncontrolled high blood pressure (BP) can lead to disability, poor quality of life, and fatal heart attack or stroke [31]. With changing global lifestyle, hypertension is affecting ever-younger individuals and its prevalence is increasing. [8]. Currently, the trend in BP monitoring devices is going towards wearable technologies and ease-of-use [25]. Current hypertension guidelines also recommend that blood pressure is measured regularly and frequently (instead of random spot measurement)[17], despite traditional BP devices with an inflatable arm cuff being uncomfortable, especially in long-term use.

Most wearable BP measurement devices use

66 pulse wave propagation or pulse wave analysis  
67 methods to measure BP [18, 19, 29]. These de-  
68 vices often require initial arm cuff calibration us-  
69 ing a brachial cuff device. Moreover, these meth-  
70 ods typically lack clinical validation and spe-  
71 cial situations and populations are seldom con-  
72 sidered. Our device relies on the oscillometric  
73 method to acquire spot BP measurements and  
74 it does not require any calibration [9]. Similar  
75 techniques have been introduced before, but they  
76 require a bulky external pneumatic unit for pres-  
77 sure generation, or are based on user actuation  
78 [20, 26, 6].

79 In our previous study we presented a table-  
80 top tonometric instrument for measuring blood  
81 pressure from the fingertip[23]. Operation of  
82 the device was validated (n=33) against an au-  
83 tomated arm cuff device (Omron M3) resulting  
84 in systolic (SBP) and diastolic (DBP) pressures  
85 ( $(mean \pm SD)$  mmHg) of  $(-0.9 \pm 7.3)$  mmHg and  
86  $(-3.3 \pm 6.6)$  mmHg, respectively. We have also  
87 proposed a miniaturized version of the device in  
88 another study[24].

89 In this study, our main objective was to vali-  
90 date the proposed device according to the inter-  
91 national BP standards. This involves compar-  
92 ing it to manual auscultation, the gold standard  
93 method for non-invasive monitoring of BP[3].  
94 The standards used for most BP devices are  
95 maintained by the US Association for the Ad-  
96 vancement of Medical Instrumentation (AAMI),  
97 the European Society of Hypertension Working  
98 Group on Blood Pressure Monitoring (ESH),  
99 British Hypertension Society (BHS) and the  
100 International Organization for Standardization  
101 (ISO) [30, 4, 21].

102 Our secondary objective was to miniaturize the  
103 technology. The main motivation for miniatur-  
104 ization is to be able to integrate the technol-  
105 ogy to a pulse oximeter, eliminating the need for  
106 an inconvenient brachial cuff and acquiring both  
107 the blood pressure and blood oxygenation from  
108 a single finger probe. In addition, we assessed the  
109 device’s capability to measure arterial stiffness  
110 and atrial fibrillation.

111 Thirdly, we wanted to demonstrate the de-  
112 vice’s capability to recognize cardiac arrhyth-  
113 mias. Atrial fibrillation (AF) is known to affect  
114 the accuracy of the oscillometric method[22]. In  
115 the case of AF, the BP results should be exam-  
116 ined critically. Inaccurate BP values can lead  
117 to incorrect treatment or even lack of it. Con-  
118 sequently, built-in AF detection algorithms are  
119 a requirement of a well performing BP monitor

[28].

## 2 Methods

### 2.1 Device development

#### 2.1.1 Electronics

124 The device uses the nRF52840 (Nordic Semi-  
125 conductor, Norway) microcontroller unit (MCU)  
126 dongle. The MCU was selected because of its  
127 high performance ARM Cortex M4 core and  
128 built-in USB capabilities. A barometric pres-  
129 sure sensor (BMP180, Bosch Sensortec, Ger-  
130 many) is connected to the MCU via I<sup>2</sup>C connec-  
131 tion. A DC motor is used to apply pressure to  
132 the finger. The MCU is interfaced to the motor  
133 via DRV8837 motor driver (Texas Instruments,  
134 USA) H-bridge that enables bidirectional motor  
135 control. The MCU also monitors the two limit  
136 switches (SSCQ110100, Alps Alpine, Japan) lo-  
137 cated on a separate PCB. The MCU is connected  
138 to a laptop computer via USB.

#### 2.1.2 Mechanics

140 The mechanics of the instrument house the elec-  
141 tronic components, provide a mechanism for ap-  
142 plying controlled pressure to the finger as well  
143 as a structural base for the tonometric pressure  
144 sensor. The enclosure was 3D printed using a se-  
145 lective laser sintering process. A standard pres-  
146 sure sensor is modified by prying off its protec-  
147 tive metal lid, and placing an air-filled cushion on  
148 top of it. A cylindrical piston is placed onto the  
149 cushion and it acts as the tonometer probe. The  
150 piston consists of two pieces attached together  
151 from the ends of a threaded shaft, enabling pis-  
152 ton extension and distension in case the protru-  
153 sion height of the piston has to be adjusted. A  
154 DC motor (generic N20 type) followed by a re-  
155 duction gear train is placed in the inner support-  
156 ing enclosure. A worm gear assembly further re-  
157 duces the rotational speed and changes the angle  
158 of rotation. The whole transmission is encased  
159 in an inner support structure. A type of folding  
160 press system is used to apply pressure to the fin-  
161 ger. The portion making contact to the finger  
162 is made from a flexible 3D printing filament. In  
163 order to make sure the pressing device does not  
164 move out of its range, the hinge is equipped with  
165 limit switches for the lower and upper bound-  
166 aries. This also prevents possible injuries that

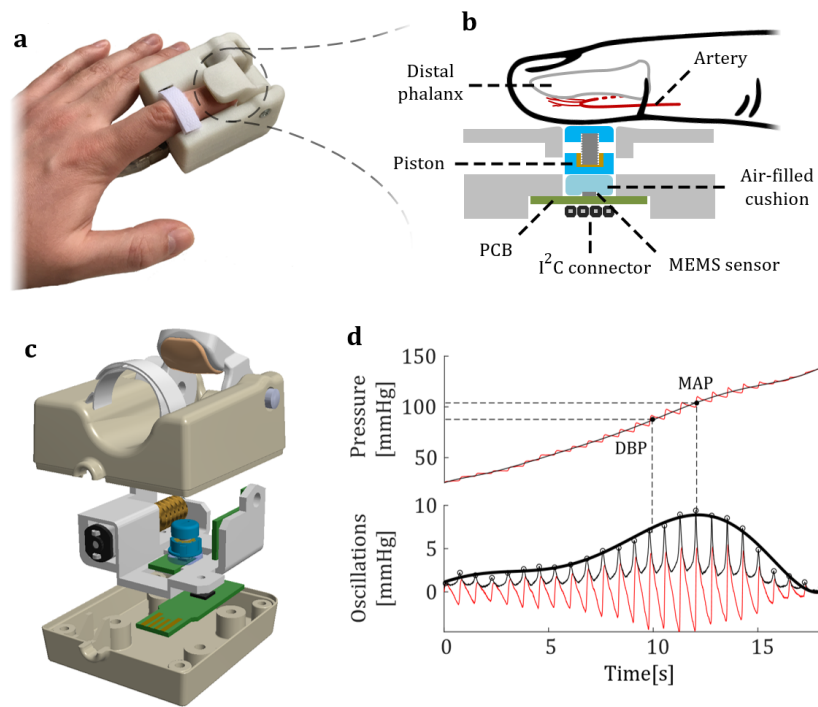

Fig. 1. Instrument overview. a) Photograph showing the device in use. b) Cross-sectional view of the sensor setup. c) 3D model of the device. d) Oscillometric method. The pressure ramp signal is filtered with a pass-band filter (1 - 10 Hz) and Hilbert transformed. The peaks, or oscillations, are detected, and a polynomial curve is fitted to the peaks. The resulting bell-shaped curve is called an oscillometric waveform envelope (OMWE). Mean arterial pressure (MAP) is found at the point on the pressure curve that corresponds with the maximum of OMWE. DBP is found on the left side of the OMWE at 80% of maximum pressure. SBP is computed from DBP and MAP.

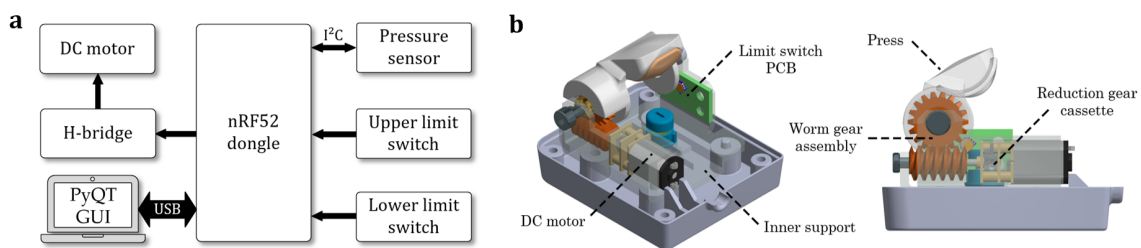

Fig. 2. Description of the system. a) Block diagram of the system. An ARM Cortex M4 based MCU is used as the controller unit. The MCU is connected to a laptop running a Python GUI for data logging. b) Inner mechanics illustrated in a 3D view. A DC motor is connected to a worm gear assembly through a reduction gear cassette. This rotates a hinge-type press that is used to apply pressure to the finger. A pair of micro limit switches assembled on a custom circuit board is used to limit the motion.

167 could be caused by excessive pressure to the fin-  
168 ger.

### 169 2.1.3 Software

170 The device firmware is written in the C program-  
171 ming language using the nRF5 software develop-  
172 ment kit (SDK). The main functionalities of the  
173 firmware are sampling the pressure sensor with  
174 sampling frequency of 128 Hz, and controlling the  
175 pressure-generating motor.

176 The measurement is controlled with a graphi-  
177 cal user interface (GUI) written in Python. The  
178 application connects to the device through a USB  
179 serial connection, which is used to send com-  
180 mands and receive data. The application plots  
181 the incoming data in real-time. The user inter-  
182 face allows the user to change the settings of the  
183 device, such as the speed of the motor and the  
184 maximum allowed pressure, as well as start and  
185 stop the measurement. Once a measurement has  
186 been completed, the received data together with  
187 the used device settings are stored in a comma-  
188 separated values (CSV) file.

## 189 2.2 Data analysis

190 Data analysis was performed on MATLAB  
191 R2019a (Mathworks, USA). Each measurement  
192 was stored in a separate CSV file and processed  
193 individually.

194 Blood pressure was computed by first subtract-  
195 ing the atmospheric pressure from the signal to  
196 set the base level for the measurement. The data  
197 are filtered with a pass-band of 1 to 10 Hz and  
198 the filtered signal is Hilbert transformed. A peak  
199 detection algorithm followed by 8th order poly-  
200 nomial fitting is applied. The resulting bell-shaped  
201 curve is called an oscillometric waveform enve-  
202 lope (OMWE). Mean arterial pressure (MAP) is  
203 found at the point on the pressure curve that  
204 corresponds with the maximum of OMWE. This  
205 also represents zero transmural pressure,  $P_t = 0$ .  
206 Transmural pressure is defined as the difference  
207 between intra-arterial and external applied pres-  
208 sure. DBP is found at the pressure level corre-  
209 sponding to 80% of maximum oscillations at the  
210 left side of OMWE. [23]

211 Systolic pressure is calculated from DBP and  
212 MAP using the following equation:

$$213 \quad SBP = \frac{MAP - (1 - k)DBP}{k} \quad (1)$$

214 We used two methods to calculate the pa-  
parameter  $k$ , resulting in two different values for

SBP. In the standard method,  $k$  was defined as  
 $k = 0.4$  for all subjects. For a patient-specific  
approach, we used ASI as an additional param-  
eter in  $k$ :  $k = 0.4 + l$ , where  $l = 5(\tilde{x}_{ASI} - ASI)$ .  
 $\tilde{x}_{ASI} = 0.03$  is the median of the calculated ASIs  
in the subject group with measured PWV ( $n =$   
18).

Arterial stiffness was calculated using the os-  
cillometric waveform envelope. The OMWE was  
plotted against  $P_t$ . The signal was then numeri-  
cally integrated, resulting in an S-shaped volume-  
transmural pressure ( $V$ - $P_t$ ) plot. To fit the data  
into a descriptive function, we used nonlinear re-  
gression:

$$y \sim f(x, \beta) \quad (2)$$

where  $x$  is an independent variable,  $y$  its as-  
sociated dependent variable and  $\beta$  is a vector  
of parameters of a nonlinear function  $f$ . We fit  
the measured volume-pressure data to an inverse  
trigonometric function:

$$f(x) = \beta_1 \arctan(\beta_2 + \beta_3 x) + \beta_4 \quad (3)$$

where  $\beta_{1...4}$  are the parameters computed using  
non-linear fitting and variable  $x$  is transmural  
pressure  $P_t$ . Since  $\beta_2$  describes the slope of  
the curve, it is used as the arterial stiffness index  
(ASI).[16]

We used the oscillometric waveform to detect  
AF. This was done during BP computation after  
fitting the 8th order polynomial curve to the  
found peaks. The absolute difference, or error,  
between the found peak and the polynomial fit  
curve was calculated for each peak. The mean  
error was calculated for each measurement and  
compared with a threshold to decide between AF  
and sinus rhythm. The principle of this is shown  
in Figure 7.

## 229 2.3 Human studies

We recruited 32 volunteers (age:  $\mu = 47$  years  
[range: 24 to 83 years], 5 women) for measure-  
ments using the proposed device and manual aus-  
cultation. One subject was excluded due to se-  
vere nail clubbing. Six subjects having persistent  
atrial fibrillation were excluded from the BP val-  
idation data set, but were used to validate the de-  
tection of AF. The validation study was carried  
out at Turku University Hospital. Subjects were  
placed in a supine position to ensure that both  
the finger device and the arm cuff were at the  
same level. Subjects were also asked to relax and

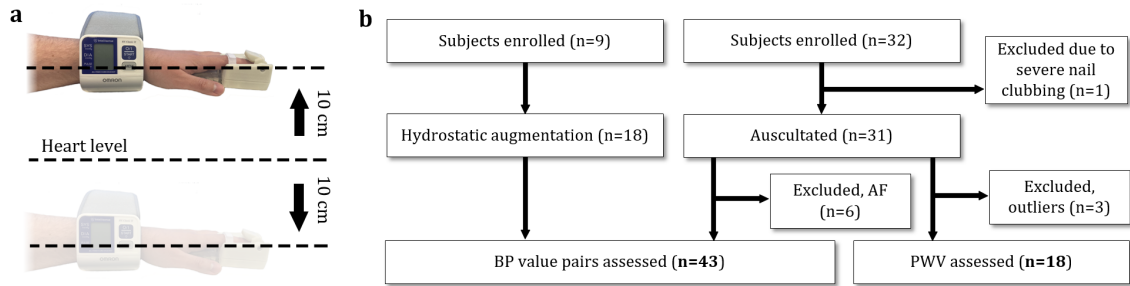

Fig. 3. a) Hydrostatic challenge. The subjects wore the finger device and a reference wrist BP monitor on the same hand. Three measurements were taken with the hand raised above and lowered below heart level, causing a change in BP. b) Clinical trial flow chart.

262 wait 10 minutes before the first measurement to  
 263 ensure that BP was stable. The finger probe was  
 264 placed on the index finger and an arm cuff con-  
 265 nected to a mercury column sphygmomanome-  
 266 ter was placed around the upper arm. Manual  
 267 auscultation was performed by two trained obser-  
 268 versers, and the maximum acceptable difference  
 269 between the readings from the observers was 4  
 270 mmHg for both SBP and DBP. After an initial  
 271 test measurement, three measurements were  
 272 taken in a cyclical manner one device after an-  
 273 other, both with the finger device and by aus-  
 274 cultation. Data is displayed in Bland-Altman  
 275 and correlation plots for SBP, MBP and DBP  
 276 individually[1].

277 In order to broaden the BP range, we recruited  
 278 9 individuals (age:  $\mu = 48$  [range: 25 to 78 years],  
 279 4 females) to perform a hydrostatic challenge.  
 280 Four of the subjects were on BP lowering med-  
 281 ication. We measured BP using our device and  
 282 a clinically validated wrist-worn BP cuff (Omron  
 283 R2, Japan) [27]. The wrist cuff uses the oscillo-  
 284 metric method for the acquisition of BP. Both in-  
 285 struments were worn in the same arm and held 10  
 286 cm below and above heart level resulting in a to-  
 287 tal of 18 data points of SBP, MAP and DBP. This  
 288 results in a change of approximately 15 mmHg  
 289 between the two levels. Three consecutive mea-  
 290 surements were taken for both hydrostatic levels.  
 291 Three of the subjects measured in this group were  
 292 also in the auscultated group, but the measure-  
 293 ments were taken over 6 months apart.

294 In addition, we took a series of subsequent  
 295 measurements to study the device's capability  
 296 to take repeated measurements. The study was  
 297 performed on one subject over approximately 20  
 298 minutes while comparing our device to a contin-  
 299 uous reference. We used a volume clamp device  
 300 CNAP 500 (CNSystems, Austria) as a reference

301 [11]. CNAP 500 is capable of outputting contin-  
 302 uous BP data including SBP, MAP and DBP  
 303 as well as the full cardiac waveform. The refer-  
 304 ence device's cuffs were placed on the middle  
 305 and ring fingers ipsilaterally and our device was  
 306 placed on the index finger. The reference device  
 307 was calibrated using the built-in brachial sphyg-  
 308 momanometer at the beginning of the measure-  
 309 ment and again at 15 minutes. A total of 9 mea-  
 310 surements were taken with our device, approx-  
 311 imately once every two minutes. A timestamp  
 312 was set on the reference device after each oscillo-  
 313 metric measurement taken on our device. As the  
 314 oscillometric sweep takes approximately 20 s, the  
 315 reference BP values were averaged over 20 s for  
 316 each measurement. We computed  $(Mean \pm SD)$   
 317 mmHg) for the measurements.

318 PWV was recorded from 18 subjects using  
 319 SphygmoCor XCEL (Atcor Medical, Australia)  
 320 and XCEL 1.3 data acquisition software [7].  
 321 The patients remained in supine position while  
 322 a femoral artery cuff was wrapped around the  
 323 thigh. A pen-like tonometer was used to acquire  
 324 the carotid waveform. The distance between the  
 325 cuff and the carotid artery via jugular notch was  
 326 measured and used to calculate the PWV. An  
 327 average of three consecutive measurements was  
 328 used for data analysis.

329 The measurements were conducted according  
 330 to the Declaration of Helsinki guidelines with the  
 331 permission of Ethical Committee of the Hospital  
 332 District of Southwest Finland and National Su-  
 333 pervisory Authority for Welfare and Health[2].



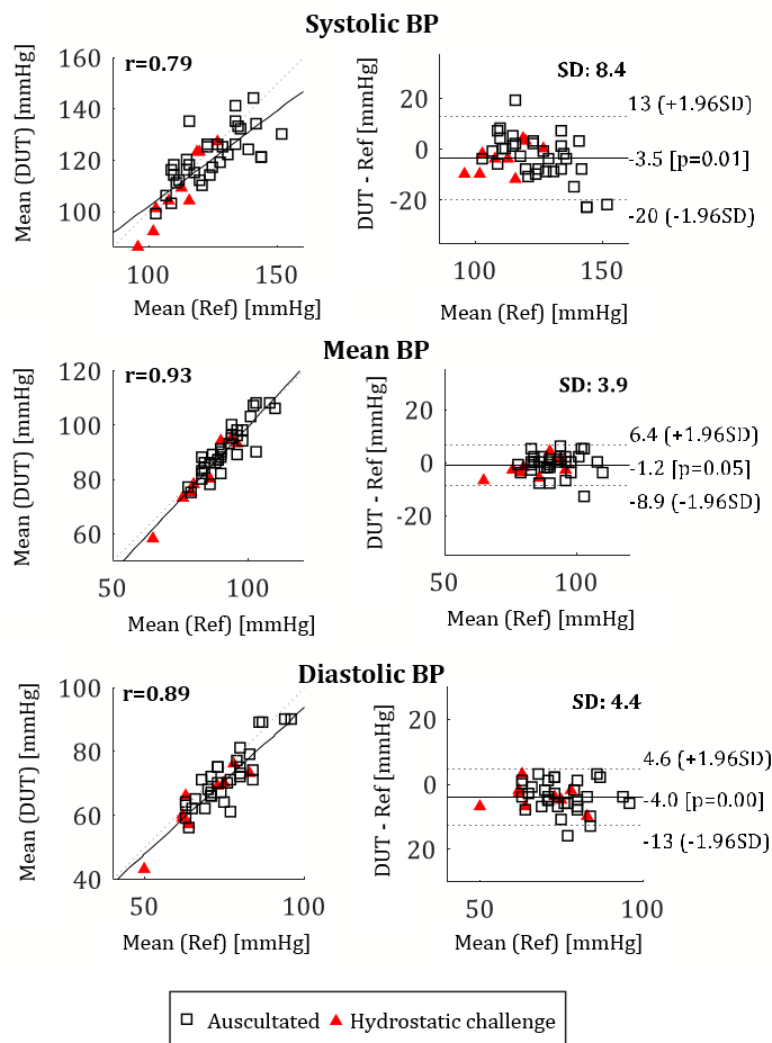

Fig. 4. Bland-Altman and correlation plots for SBP, MBP and DBP. The two data sets, auscultated and hydrostatic challenge, are plotted with different markers.

### 3 Results

#### 3.1 Blood pressure

Accuracy of the blood pressure measurement was verified by combining the two data sets collected: the auscultatory set ( $n=25$ ) and the hydrostatic challenge set ( $n=18$ ). A total of 43 pairs of BP values were analyzed. The blood pressures measured ranged from 96 to 152 mmHg and from 50 to 96 mmHg for SBP and DBP respectively. We calculated ( $mean \pm SD$ ) mmHg for SBP, MBP and DBP, resulting in  $(-4.9 \pm 9.5)$  mmHg,  $(-1.2 \pm 3.9)$  mmHg and  $(-4.0 \pm 4.4)$  mmHg respectively. The patient-specific method for computing SBP performed better  $(-3.5 \pm 8.4)$  mmHg) than the standard method. Mean and diastolic pressure values comply with the international standards for non-invasive BP monitors. Standard deviation for SBP (8.4 mmHg) was 0.4 mmHg higher than the AAMI standard threshold (8 mmHg) [30]. However, the method for computing SBP was very simple and we believe that using more sophisticated computation techniques, the standard could be met even for SBP. Moreover, the accuracy of MBP is suitable for longitudinal bedside BP monitoring.

#### 3.2 Repeatability

We wanted to evaluate the device's capability for long term monitoring. We took 9 consecutive measurements from the same subject over a 20 min period. Consecutive measurements taken with our device were very close to the reference device and followed the changes in BP correctly. Comparison of the repeated measurements to the reference device resulted in SBP of  $(-6.9 \pm 4.7)$  mmHg, MBP of  $(0.6 \pm 4.0)$  mmHg, and DBP of  $(1.6 \pm 3.4)$  mmHg. The entire measurement is shown in Fig. 5.

#### 3.3 Arterial stiffness

Arterial stiffness was evaluated by analyzing the shape of the oscillogram acquired by the finger device, resulting in an arterial stiffness index (ASI). The ASI describes the compressibility of the artery when external pressure is applied to it. This is characterized by the slope of the curve in the  $V-P_t$  plot. The computed ASI was compared with various other parameters. PWV and ASI showed a negative correlation ( $r=-0.4$ ), which is comparable to the results presented in the literature[16]. This suggests that individuals

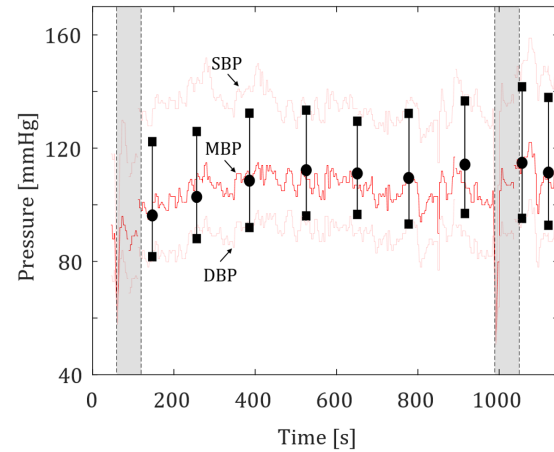

Fig. 5. Repeatability study. Oscillometric measurements (shown as black vertical lines and markers) were taken with the finger device approx. every 2 minutes. The red and light red lines represent the continuous BP taken with the reference device CNAP 500.

with high PWV readings have lower ASI, thus less compliant arteries. Individuals with lower PWV seem to have more variation in ASI with high and low ASI values. Similar phenomenon was noticed when we compared ASI and age. Younger subjects ( $<40$  y) tend to have higher variation in ASI than older ones ( $>60$  y). However, the younger group shows a 40% higher mean value than the older group. In interpreting the results between PWV and ASI, it is important to understand that PWV is dependent on two intrinsic variables: arterial stiffness and BP. Due to this, PWV and ASI do not have a linear relationship [10]. As can be concluded from the results shown in Subsection 3.1, ASI does indeed hold BP information and can be used as an additional parameter for computing BP.

#### 3.4 Atrial fibrillation detection

We wanted to both demonstrate the device's capability of detecting AF and exclude these patients from the validation data set, since AF is known to affect oscillometric BP measurements significantly. AF was found on six subjects. The mean error from OMWE in mmHg was computed for each subject. In AF, the pulse pressure varies randomly, resulting in deformation of the oscillometric envelope. Single pulses can be higher or lower than the OMWE, increasing the mean error. A 0.8 mmHg threshold was used to differ-

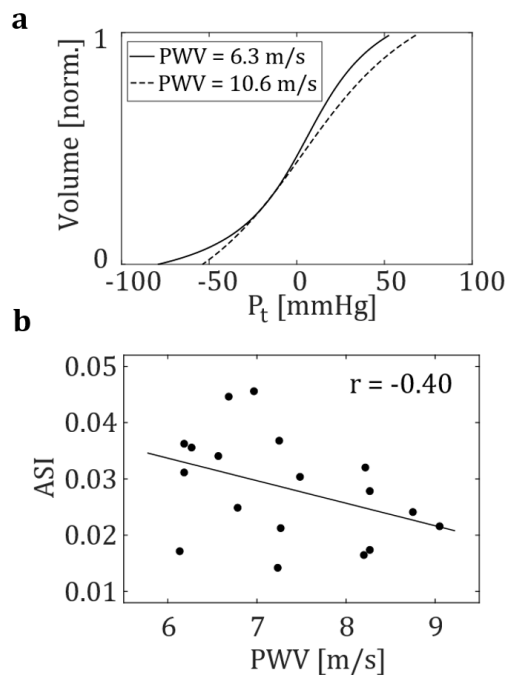

Fig. 6. a) Example  $V$ - $P_t$  plots estimating arterial compliance for a young subject with low carotid-to-femoral PWV (6.3 m/s) and an elderly subject with high PWV (10.6 m/s). The slope of the curve in the young subject's case is higher, resulting in higher ASI. b) Figure showing the negative correlation between ASI and PWV.

entiate AF from sinus rhythm. Figure 7 shows that AF cases can be classified using a simple threshold.

## 4 Discussion

We presented a miniaturized finger probe for measuring BP, assessing arterial stiffness and detecting atrial fibrillation. In this study, the sensor technology introduced in our previous article was integrated into a pulse-oximeter-style wearable probe [23]. This allows the device to be discrete and unobtrusive while making integration to existing patient monitors possible. We validated the the device in a clinical trial, comparing the proposed device with auscultation - the gold standard method for non-invasive BP measurement. In an attempt to improve the credibility of the validation, we introduced additional high- and low-BP values into the data set via hydrostatic challenge. This way we were able to record more high and low pressures without having to recruit subjects having such BP values. The results for MBP and DBP fulfill the bias and precision criteria set by AAMI, but the standard deviation for the SBP are slightly above the standard threshold (0.4 mmHg above the limit). The accuracy could be improved by more sophisticated algorithms and better positioning of the finger. One possibility is either to use a personalized molded insert or an adjustable back piece to make sure the device geometry is optimal for each individual. This would be viable especially for long-term use. The study differs from standard protocol in population size and BP range. Our study size ( $n = 43$ ) satisfies the criteria for the number of subjects set by ESH ( $n=33$ ) but not by AAMI ( $n=85$ ). In addition, we used the hydrostatic challenge to increase the data set, which is not a method recommended in any of the standards. Not all of the study population requirements were met either. The subjects recruited in the study were either normotensive or had their hypertension under control. We were able to broaden the BP range with hydrostatic challenge, but we still miss the very high BP of  $>160$  mmHg for SBP and  $>100$  mmHg for DBP. Arterial stiffness was evaluated by analyzing the shape of the oscillogram. Our measurements suggest that ASI can be used as an additional parameter for computing BP. We found a negative correlation between ASI and carotid-to-femoral PWV, similar to the findings in the literature[16].



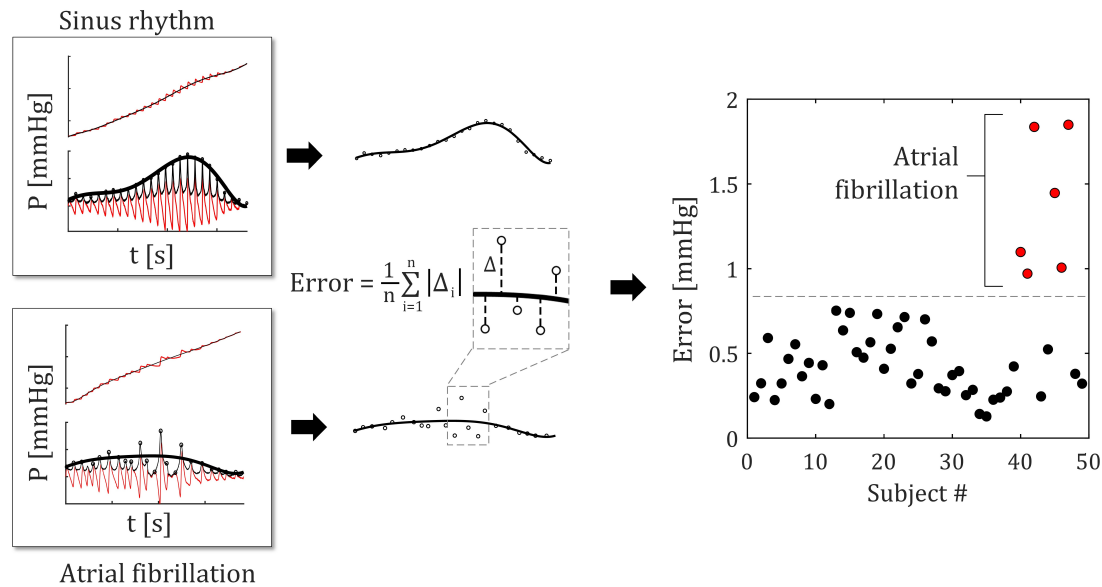

Fig. 7. Atrial fibrillation detection. The difference between the oscillometric envelope and the amplitude of each peak is used to calculate the mean error. The algorithm was able to differentiate AF from sinus rhythm using the error between oscillometric envelope and pulse peaks.

463 Age and ASI were also found to correlate. ASI  
464 could possibly be used as a feature in machine  
465 learning applications for more pervasive hemo-  
466 dynamic monitoring. We were also able to dis-  
467 tinguish AF cases from sinus rhythm cases using  
468 simple metrics derived from the oscillometric en-  
469 velope.

470 The finger-pressing system has a clear advan-  
471 tage over cuff-based systems: One device is suit-  
472 able for all finger sizes. Brachial and finger  
473 cuff devices often have different cuffs for small,  
474 medium, and large anatomies. The study sub-  
475 jects also noted that the finger device produced  
476 much less discomfort than a traditional brachial  
477 cuff. Especially in the case of hypertensive pa-  
478 tients, the pressure required for complete brachial  
479 occlusion can cause significant pain. Compression  
480 applied on the fingertip causes less distal tis-  
481 sue occlusion compared to brachial, radial, and  
482 proximal phalanx cuff occlusion. Furthermore,  
483 taking short oscillometric measurements period-  
484 ically is much less uncomfortable than having to  
485 maintain partial occlusion continuously, which  
486 is the case in volume-clamp methods [12]. An-  
487 other significant advantage to the volume-clamp  
488 method and most wearable devices is that our  
489 approach does not need any form of calibration,  
490 which is usually done by brachial cuff oscillome-  
491 try.

492 There are also limitations to the technology. 492  
493 In several cases, the subject had cold fingers, 493  
494 which significantly affected the quality of the sig- 494  
495 nal. One subject had undergone surgery on his 495  
496 left arm, making it difficult for him to hold his 496  
497 hand in the correct position. Additionally, for 497  
498 several subjects, the subject's finger had to be 498  
499 repositioned several times to ensure good signal 499  
500 quality and coupling of arterial pulsation to the 500  
501 sensor. This suggests that the sensor is quite sen- 501  
502 sitive to misplacement. However, when correctly 502  
503 positioned, the measurements had high repeata- 503  
504 bility, as demonstrated in Subsection 3.2, which 504  
505 is crucial for long-term bedside monitoring.

506 Additionally, future directions could include a 506  
507 more exhaustive study on pseudo-continuous BP 507  
508 monitoring. An ideal setup would include an 508  
509 invasive reference e.g. during a surgical oper- 509  
510 ation. In our previous publication, we demon- 510  
511 strated that using fingertip tonometry, we were 511  
512 able to acquire high resolution BP waveform sim- 512  
513 ilar to invasive BP [13]. The combination of peri- 513  
514 odic oscillometric measurements and pulse wave- 514  
515 form could be of clinical use. Another interesting 515  
516 topic is to study how the device performs in noc- 516  
517 turnal BP monitoring, possibly including opti- 517  
518 cal oxygen saturation sensing. Nocturnal hypox- 518  
519 emia, that is, a decrease in peripheral oxygen sat- 519  
520 uration during sleep is a marker of adverse con-

ditions, such as chronic obstructive pulmonary disease [5] and obstructive sleep apnea. Furthermore, it has been reported to inversely correlate with morning surge of BP, which, on the other hand, is an important diagnostic tool in the management of hypertension [14, 15]. Making the device wireless and battery-operated would enable convenient data collection in nursing homes or even in a home environment. The current enclosure still has room for a small lithium-polymer battery as well as a charging circuit, and the microcontroller used has Bluetooth radio communication capabilities. However, this is more of a novel engineering challenge. Compared to a bulky BP device, a small portable device would be easier for the healthcare professional to carry on the hospital ward.

## Author Contributions

Conception and design: T.P., T.N., I.K. and M.K., System development: T.P. and J.S., Collection and assembly of data: T.P., J.S., T.N., I.K. and M.K., Analysis and interpretation of the data: T.P., Drafting of the article: T.P., J.S. and M.K., Obtaining funding: M.P., T.K. and M.K.

## References

[1] A. Aalok. Bland-altman and correlation plot, 2022.

[2] W. M. Association et al. World medical association declaration of helsinki: ethical principles for medical research involving human subjects. *Jama*, 310(20):2191–2194, 2013.

[3] J. Booth. A short history of blood pressure measurement. *Proc roy Soc Med*, 70:793–799, 1977.

[4] E. Brien, J. Petrie, W. Littler, M. de Swiet, P. Padfield, D. Altman, M. Bland, A. Coats, and N. Atkins. The british hypertension society protocol for the evaluation of blood pressure devices. *J Hypertens*, 11(Suppl. 2):S43–S62, 1993.

[5] J. Buekers, J.-M. Aerts, J. Theunis, A. Vaes, E. Wouters, M. Spruit, and P. De Boever. Multi-night continuous nocturnal oxygen saturation measurements in patients with copd, 2018.

[6] A. Chandrasekhar, C.-S. Kim, M. Naji, K. Natarajan, J.-O. Hahn, and R. Mukkamala. Smartphone-based blood pressure monitoring via the oscillometric finger-pressing method. *Science translational medicine*, 10(431):eaap8674, 2018.

[7] J. M. Davies, M. A. Bailey, K. J. Griffin, and D. J. A. Scott. Pulse wave velocity and the non-invasive methods used to assess it: Complior, sphygmocor, arteriograph and vircorder. *Vascular*, 20(6):342–349, 2012.

[8] J. M. Flack and B. Adekola. Blood pressure and the new acc/aha hypertension guidelines. *Trends in Cardiovascular Medicine*, 30(3):160–164, 2020.

[9] M. Forouzanfar, H. R. Dajani, V. Z. Groza, M. Bolic, S. Rajan, and I. Batkin. Oscillometric blood pressure estimation: past, present, and future. *IEEE reviews in biomedical engineering*, 8:44–63, 2015.

[10] A. Giudici, C. Palombo, M. Kozakova, C. Morizzo, J. K. Cruickshank, and A. W. Khir. Subject-specific pressure normalization of local pulse wave velocity: Separating intrinsic from acute load-dependent stiffening in hypertensive patients. *Frontiers in Physiology*, 12:783457–783457, 2021.

[11] R. Hahn, H. Rinösl, M. Neuner, and S. Kettner. Clinical validation of a continuous non-invasive haemodynamic monitor (cnap™ 500) during general anaesthesia. *British journal of anaesthesia*, 108(4):581–585, 2012.

[12] B. P. Imholz, W. Wieling, G. A. van Montfrans, and K. H. Wesseling. Fifteen years experience with finger arterial pressure monitoring: assessment of the technology. *Cardiovascular research*, 38(3):605–616, 1998.

[13] M. Kaisti, T. Panula, J. Leppänen, R. Punkkinen, M. Jafari Tadi, T. Vasankari, S. Jaakkola, T. Kiviniemi, J. Airaksinen, P. Kostianen, et al. Clinical assessment of a non-invasive wearable mems pressure sensor array for monitoring of arterial pulse waveform, heart rate and detection of atrial fibrillation. *NPJ digital medicine*, 2(1):1–10, 2019.

[14] K. Kario, H. Kanegae, N. Tomitani, Y. Okawara, T. Fujiwara, Y. Yano, 614

- 615 S. Hoshide, and J.-H. S. Group. Nighttime  
616 blood pressure measured by home blood  
617 pressure monitoring as an independent pre-  
618 dictor of cardiovascular events in general  
619 practice: The j-hop nocturnal blood pres-  
620 sure study. *Hypertension*, 73(6):1240–1248,  
621 2019.
- 622 [15] A. Kishimoto, O. Tochikubo, and  
623 K. Ohshige. Relation between nocturnal  
624 arterial oxygen desaturation and morning  
625 blood pressure. *Clinical and Experimental*  
626 *Hypertension*, 29(1):51–60, 2007.
- 627 [16] H. Komine, Y. Asai, T. Yokoi, and  
628 M. Yoshizawa. Non-invasive assessment of  
629 arterial stiffness using oscillometric blood  
630 pressure measurement. *Biomedical engineer-*  
631 *ing online*, 11(1):1–12, 2012.
- 632 [17] P. Muntner, D. Shimbo, R. M. Carey, J. B.  
633 Charleston, T. Gaillard, S. Misra, M. G.  
634 Myers, G. Ogedegbe, J. E. Schwartz, R. R.  
635 Townsend, et al. Measurement of blood pres-  
636 sure in humans: a scientific statement from  
637 the american heart association. *Hyperten-*  
638 *sion*, 73(5):e35–e66, 2019.
- 639 [18] D. Nachman, Y. Gepner, N. Goldstein,  
640 E. Kabakov, A. B. Ishay, R. Littman, Y. Az-  
641 mon, E. Jaffe, and A. Eisenkraft. Compar-  
642 ing blood pressure measurements between  
643 a photoplethysmography-based and a stan-  
644 dard cuff-based manometry device. *Scien-*  
645 *tific reports*, 10(1):1–9, 2020.
- 646 [19] D. Nair, S. Tan, H. Gan, S. Lim, J. Tan,  
647 M. Zhu, H. Gao, N. Chua, W. Peh, and  
648 K. Mak. The use of ambulatory tonomet-  
649 ric radial arterial wave capture to measure  
650 ambulatory blood pressure: the validation of  
651 a novel wrist-bound device in adults. *Jour-*  
652 *nal of human hypertension*, 22(3):220–222,  
653 2008.
- 654 [20] R. Narasimhan, T. Parlikar, G. Verghese,  
655 and M. V. McConnell. Finger-wearable  
656 blood pressure monitor. In *2018 40th An-*  
657 *ual International Conference of the IEEE*  
658 *Engineering in Medicine and Biology Soci-*  
659 *ety (EMBC)*, pages 3792–3795. IEEE, 2018.
- 660 [21] E. O’Brien, T. Pickering, R. Asmar, M. My-  
661 ers, G. Parati, J. Staessen, T. Mengden,  
662 Y. Imai, B. Waeber, P. Palatini, et al. Work-  
663 ing group on blood pressure monitoring of  
664 the european society of hypertension in-  
665 ternational protocol for validation of blood  
666 pressure measuring devices in adults. *Blood*  
667 *pressure monitoring*, 7(1):3–17, 2002.
- 668 [22] N. Pagonas, S. Schmidt, J. Eysel, F. Com-  
669 pton, C. Hoffmann, F. Seibert, J. Hilpert,  
670 C. Tschöpe, W. Zidek, and T. H. Westhoff.  
671 Impact of atrial fibrillation on the accuracy  
672 of oscillometric blood pressure monitoring.  
673 *Hypertension*, 62(3):579–584, 2013.
- 674 [23] T. Panula, T. Koivisto, M. Pänkäälä, T. Ni-  
675 ranen, I. Kantola, and M. Kaisti. An  
676 instrument for measuring blood pressure  
677 and assessing cardiovascular health from the  
678 fingertip. *Biosensors and Bioelectronics*,  
679 167:112483, 2020.
- 680 [24] T. Panula, J.-P. Sirkkiä, and M. Kaisti.  
681 Miniaturization of a finger-worn blood pres-  
682 sure instrument. In *2021 43rd Annual Inter-*  
683 *national Conference of the IEEE Engineer-*  
684 *ing in Medicine & Biology Society (EMBC)*,  
685 pages 7441–7444. IEEE, 2021.
- 686 [25] T. Panula, J.-P. Sirkia, D. Wong, and  
687 M. Kaisti. Advances in non-invasive blood  
688 pressure measurement techniques. *IEEE Re-*  
689 *views in Biomedical Engineering*, 2022.
- 690 [26] L.-Y. Shyu, Y.-L. Kao, W.-Y. Tsai, and  
691 W. Hu. Development of a cuffless blood pres-  
692 sure measurement system. In *2012 Annual*  
693 *International Conference of the IEEE En-*  
694 *gineering in Medicine and Biology Society*,  
695 pages 2040–2043. IEEE, 2012.
- 696 [27] J. Topouchian, D. Agnoletti, J. Blacher,  
697 A. Youssef, I. Ibanez, J. Khabouth,  
698 S. Khawaja, L. Beaino, and R. Asmar. Val-  
699 idation of four automatic devices for self-  
700 measurement of blood pressure according to  
701 the international protocol of the european  
702 society of hypertension. *Vascular health and*  
703 *risk management*, 7:709, 2011.
- 704 [28] W. J. Verberk, S. Omboni, A. Kollias, and  
705 G. S. Stergiou. Screening for atrial fibril-  
706 lation with automated blood pressure mea-  
707 surement: research evidence and practice  
708 recommendations. *International journal of*  
709 *cardiology*, 203:465–473, 2016.
- 710 [29] A. Vybornova, E. Polychronopoulou,  
711 A. Wurznier-Ghajarzadeh, S. Fallet, J. Sola,  
712 and G. Wuerzner. Blood pressure from the

713 optical aktiia bracelet: a 1-month validation  
714 study using an extended iso81060-2 protocol  
715 adapted for a cuffless wrist device. *Blood*  
716 *pressure monitoring*, 26(4):305–311, Aug  
717 2021.

718 [30] W. B. White, A. S. Berson, C. Robbins,  
719 M. J. Jamieson, L. M. Prisant, E. Roccella,  
720 and S. G. Sheps. National standard for mea-  
721 surement of resting and ambulatory blood  
722 pressures with automated sphygmomanome-  
723 ters. *Hypertension*, 21(4):504–509, 1993.

724 [31] World health organization, hypertension.  
725 [https://www.who.int/news-room/fact-](https://www.who.int/news-room/fact-sheets/detail/hypertension)  
726 [sheets/detail/hypertension](https://www.who.int/news-room/fact-sheets/detail/hypertension). Accessed:  
727 2021-01-04.
